# Supplementary material for: A Serum Protein Biomarker Panel Improves Outcome Prediction in Human Traumatic Brain Injury
Source: PubMed Central journal article supplement (PMC6761606; doi:10.1089/neu.2019.6375), 2019-09-23

**A** Marshall CT vs S100B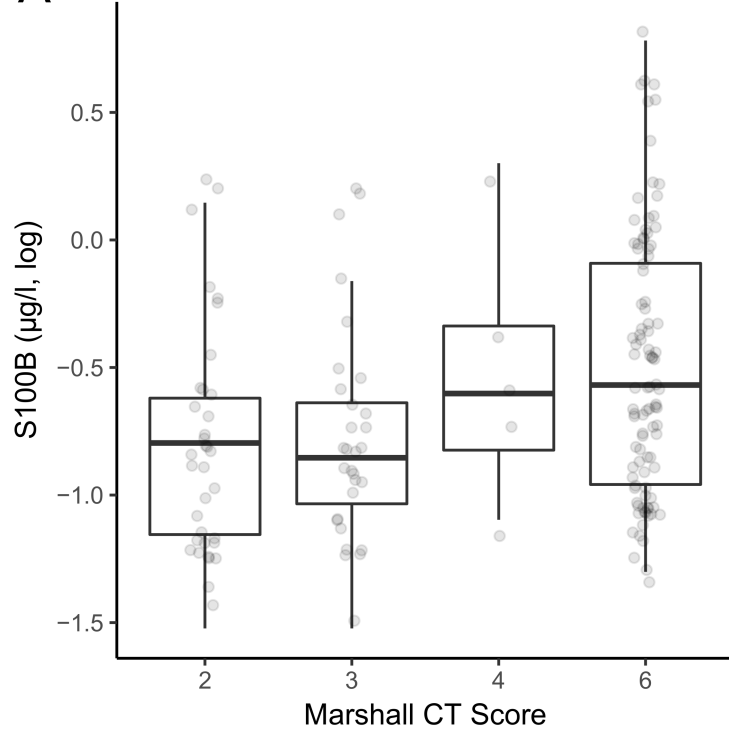

Marshall CT vs NSE

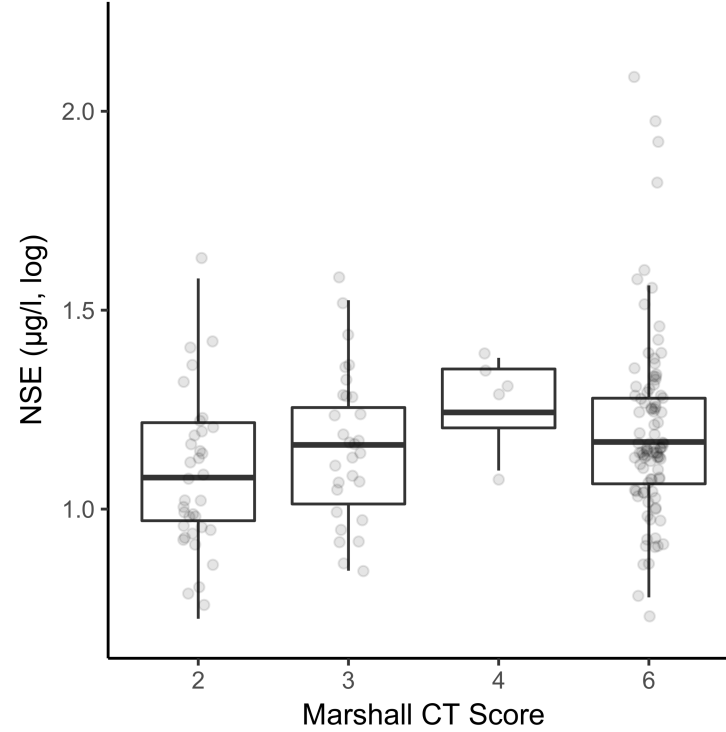

Marshall CT vs GFAP

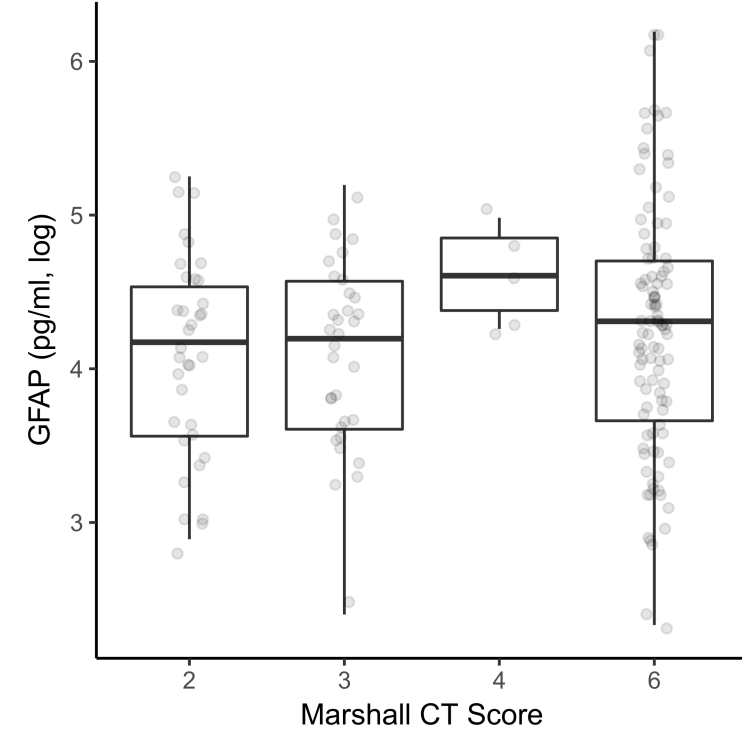

Marshall CT vs UCH-L1

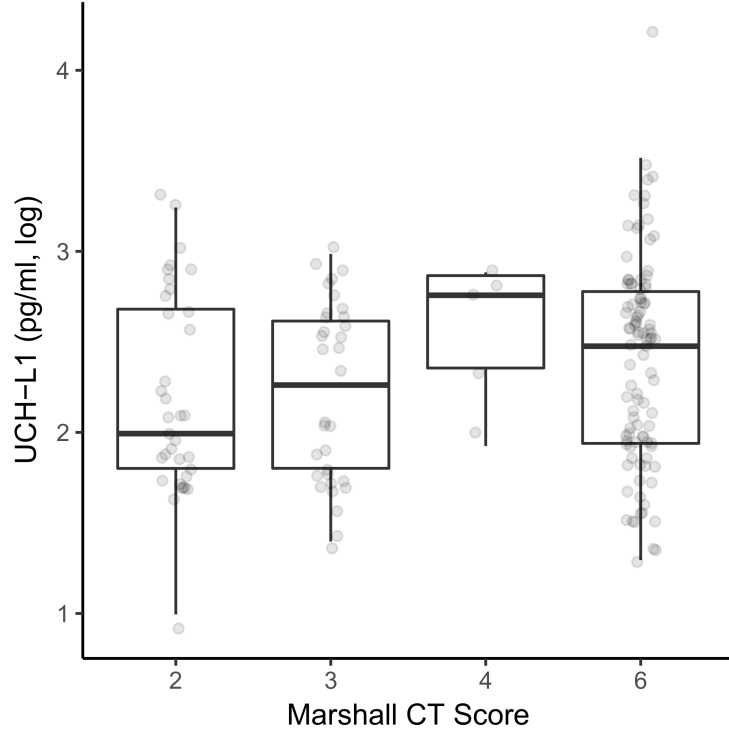

Marshall CT vs Tau

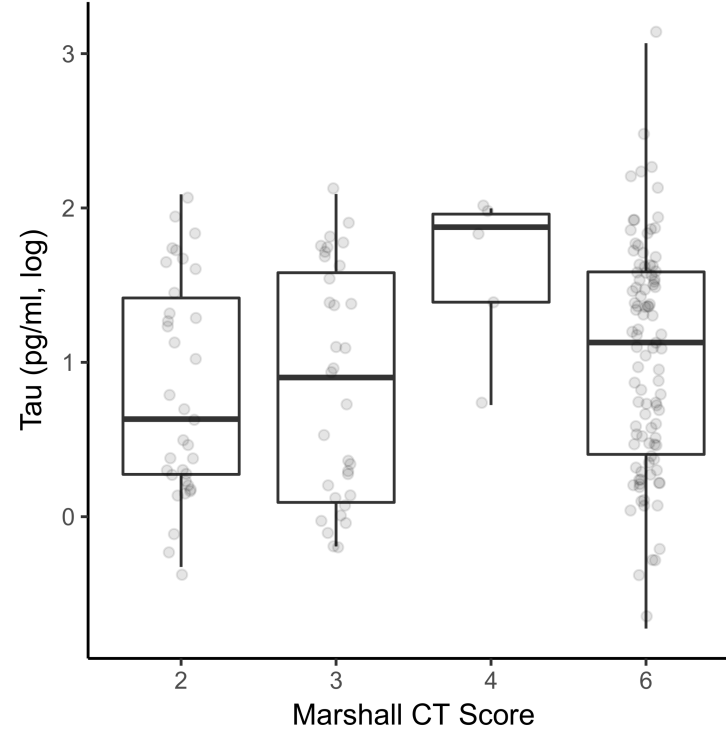

Marshall CT vs NF-L

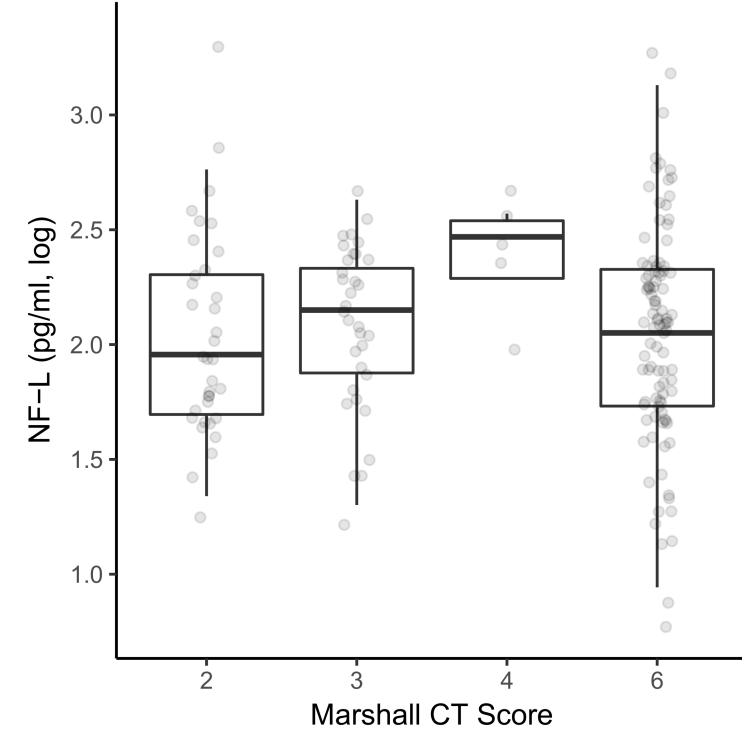

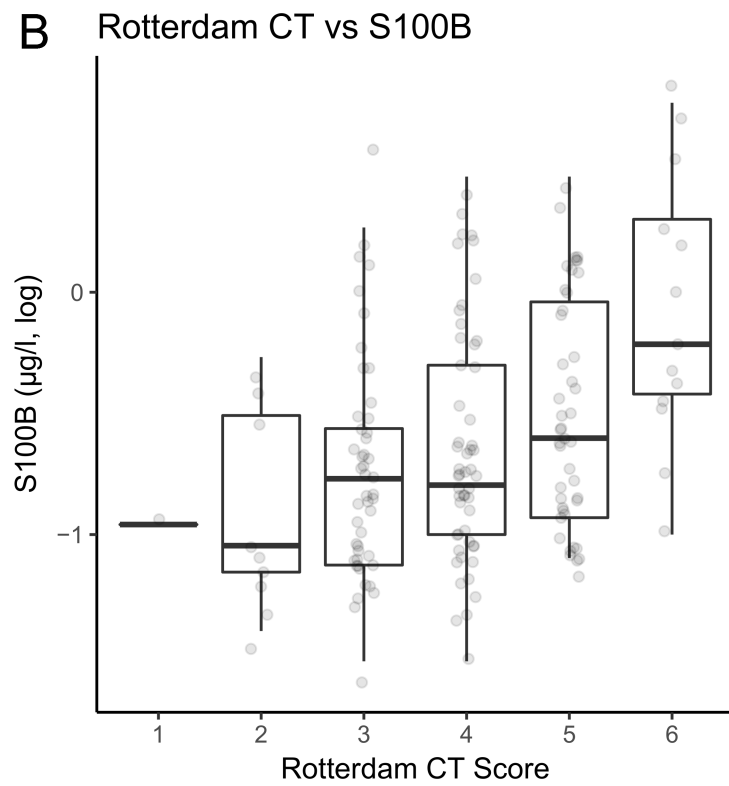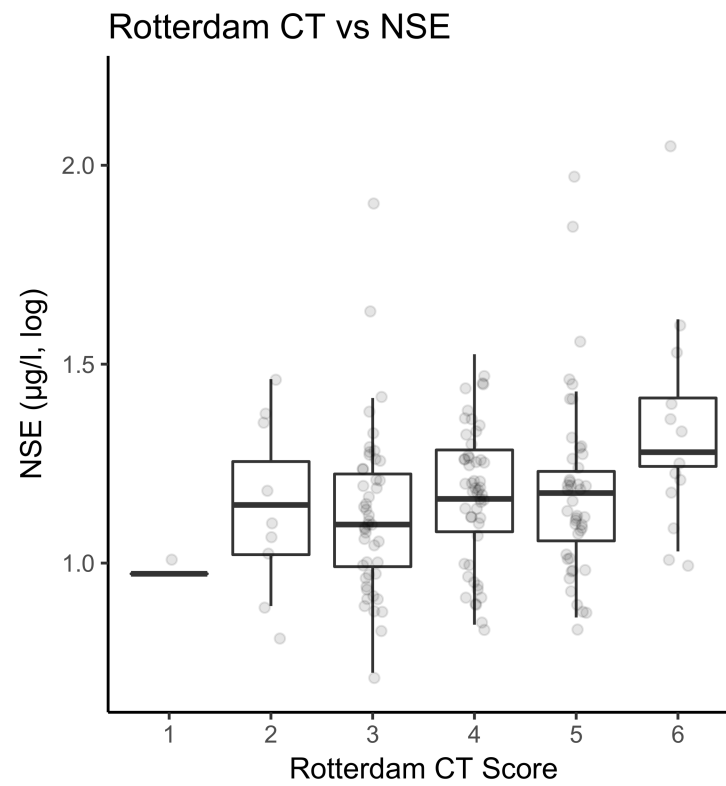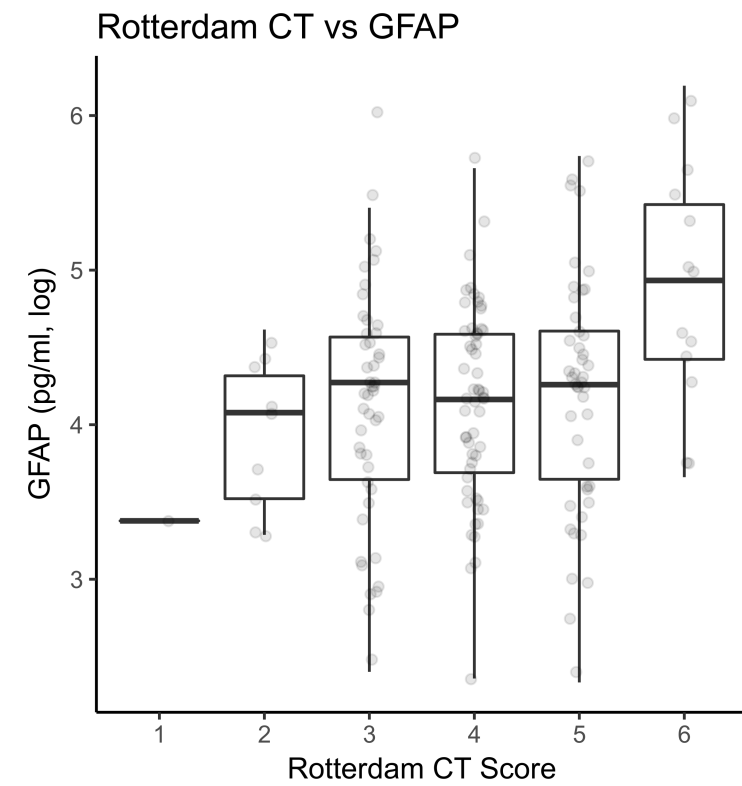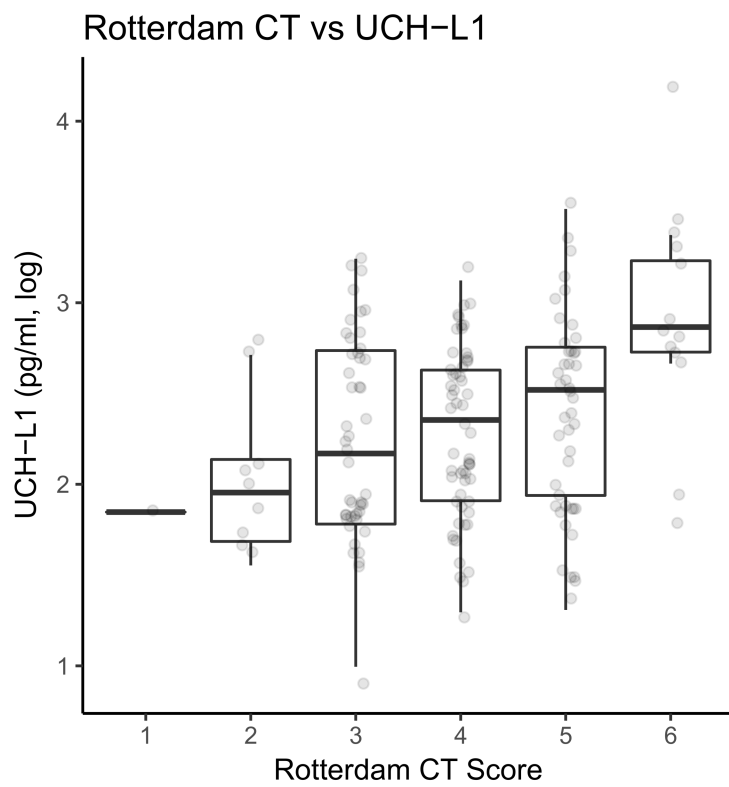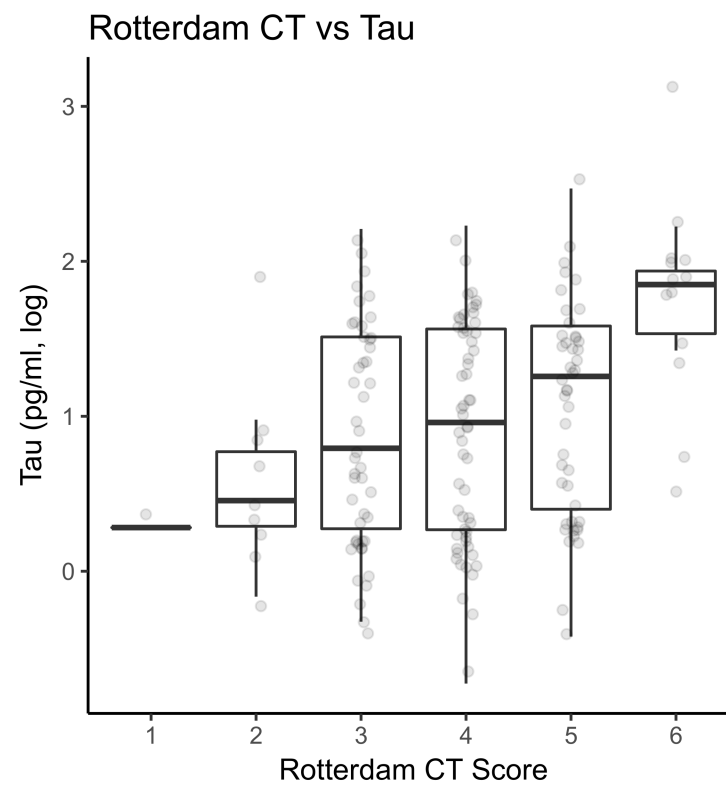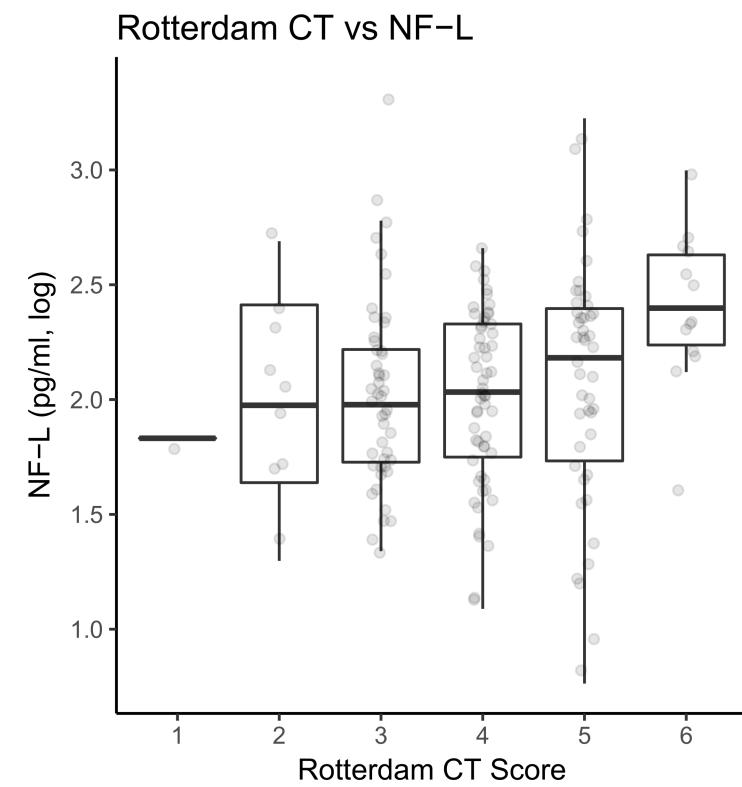

**C**

Stockholm CT vs S100B

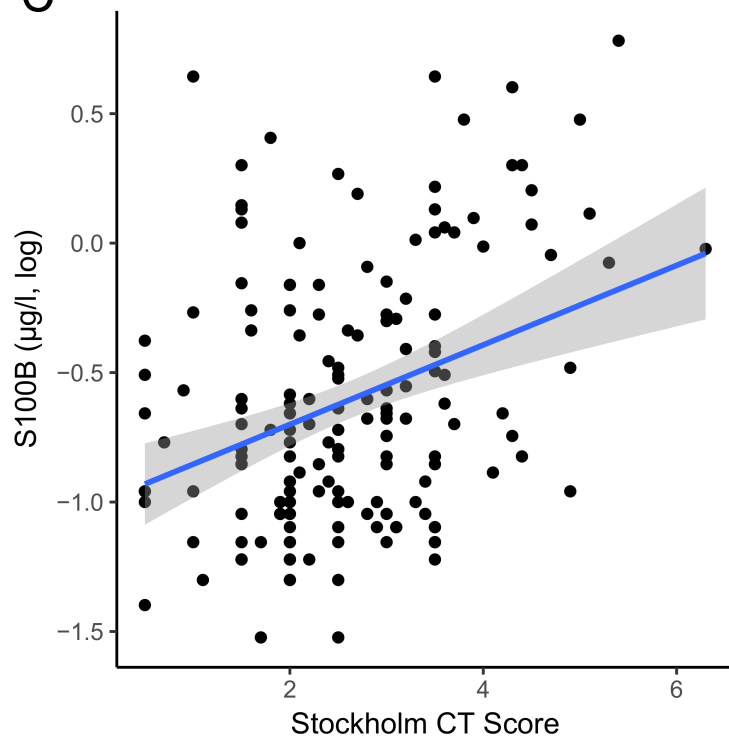

Stockholm CT vs NSE

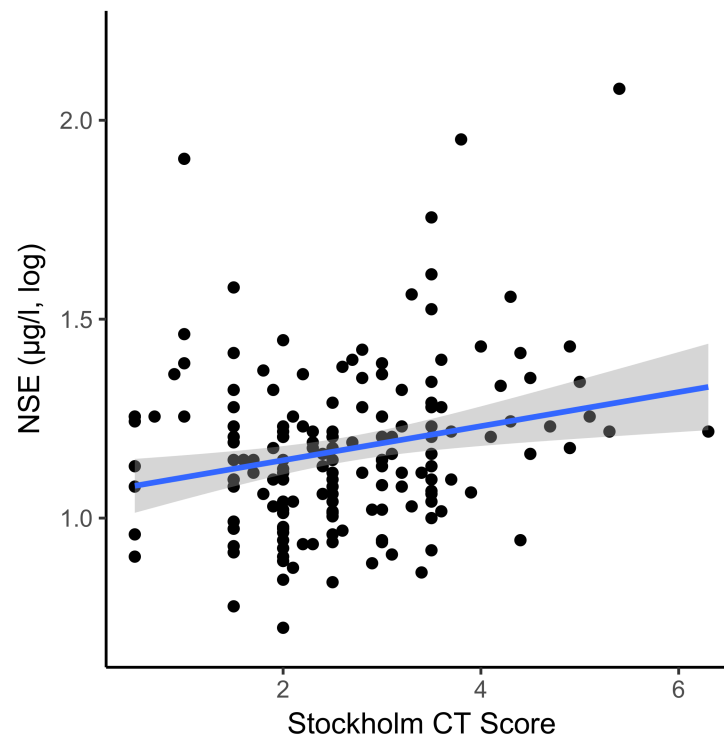

Stockholm CT vs GFAP

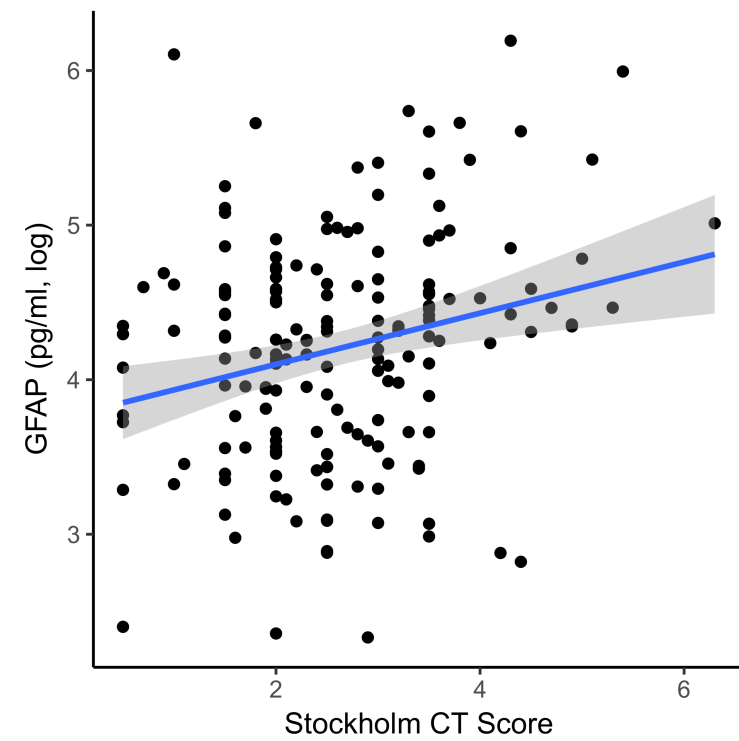

Stockholm CT vs UCH-L1

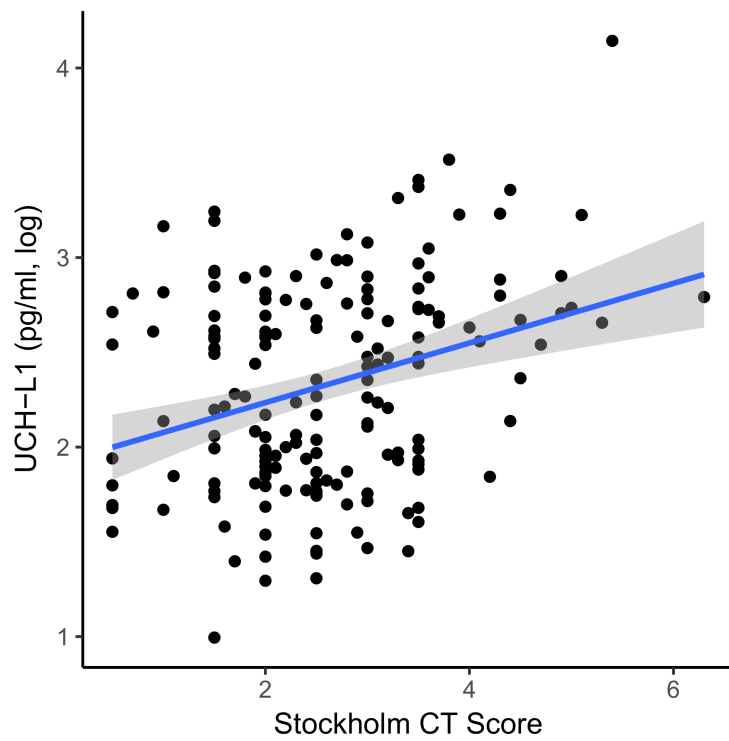

Stockholm CT vs Tau

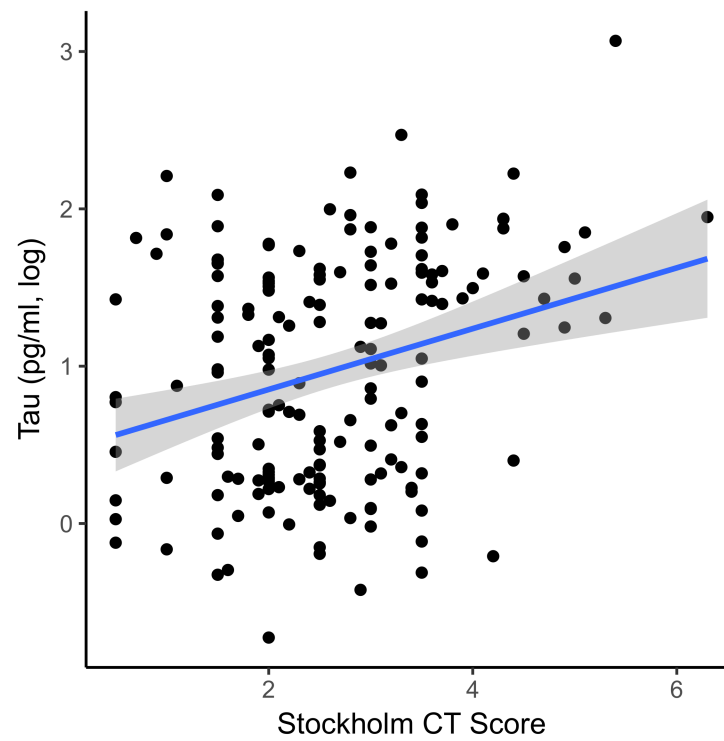

Stockholm CT vs NF-L

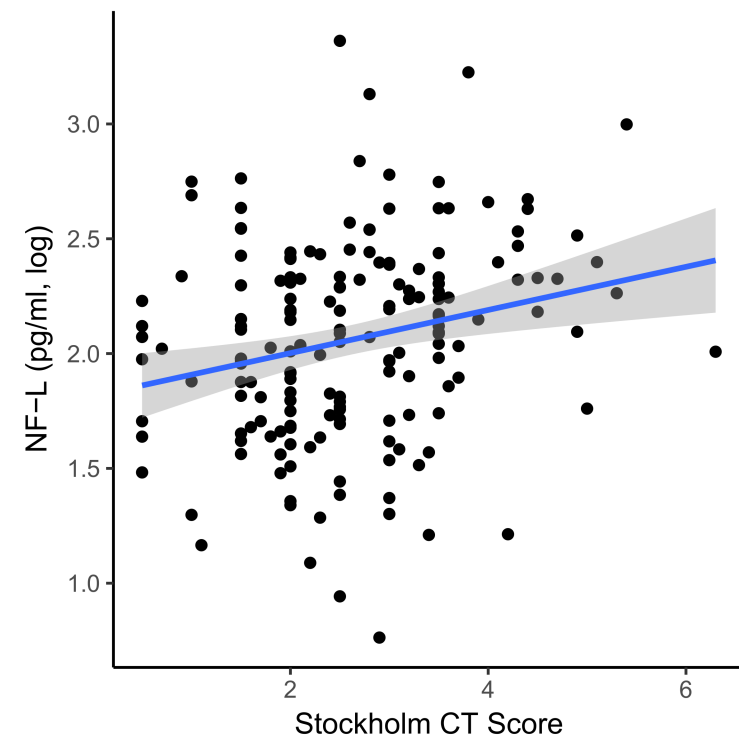

Supplement: Suppl_FigureS1.pdf [file Suppl_FigureS1.pdf]
