# Supplementary material for: A Serum Protein Biomarker Panel Improves Outcome Prediction in Human Traumatic Brain Injury
Source: PubMed Central journal article supplement (PMC6761606; doi:10.1089/neu.2019.6375), 2019-09-23
Supplement: Suppl_DocS1.pdf [file Suppl_DocS1.pdf]

## STROBE statement: Reporting guidelines checklist for cohort, case-control and cross-sectional studies

“A serum protein biomarker panel improves outcome prediction in human traumatic brain injury”

| SECTION                   | ITEM NUMBER | CHECKLIST ITEM                                                                                                                                                                                                                                                                                                                                                                                                                             | REPORTED ON PAGE NUMBER: |
|---------------------------|-------------|--------------------------------------------------------------------------------------------------------------------------------------------------------------------------------------------------------------------------------------------------------------------------------------------------------------------------------------------------------------------------------------------------------------------------------------------|--------------------------|
| <b>TITLE AND ABSTRACT</b> |             |                                                                                                                                                                                                                                                                                                                                                                                                                                            |                          |
|                           | 1a          | Indicate the study’s design with a commonly used term in the title or the abstract                                                                                                                                                                                                                                                                                                                                                         | Abstract (Page 4)        |
|                           | 1b          | Provide in the abstract an informative and balanced summary of what was done and what was found                                                                                                                                                                                                                                                                                                                                            | Abstract (Page 4)        |
| <b>INTRODUCTION</b>       |             |                                                                                                                                                                                                                                                                                                                                                                                                                                            |                          |
| Background and objectives | 2           | Explain the scientific background and rationale for the investigation being reported                                                                                                                                                                                                                                                                                                                                                       | 6-8                      |
|                           | 3           | State specific objectives, including any pre-specified hypotheses                                                                                                                                                                                                                                                                                                                                                                          | 8                        |
| <b>METHODS</b>            |             |                                                                                                                                                                                                                                                                                                                                                                                                                                            |                          |
| Study design              | 4           | Present key elements of study design early in the paper                                                                                                                                                                                                                                                                                                                                                                                    | 9                        |
| Setting                   | 5           | Describe the setting, locations, and relevant dates, including periods of recruitment, exposure, follow-up, and data collection                                                                                                                                                                                                                                                                                                            | 9-11                     |
| Participants              | 6a          | Cohort study—Give the eligibility criteria, and the sources and methods of selection of participants. Describe methods of follow-up<br>Case-control study—Give the eligibility criteria, and the sources and methods of case ascertainment and control selection. Give the rationale for the choice of cases and controls<br>Cross-sectional study—Give the eligibility criteria, and the sources and methods of selection of participants | 9-11                     |
|                           | 6b          | Cohort study—For matched studies, give matching criteria and number of exposed and unexposed<br>Case-control study—For matched studies, give matching criteria and the number of controls per case<br>Variables                                                                                                                                                                                                                            | N/A                      |

| SECTION                   | ITEM NUMBER | CHECKLIST ITEM                                                                                                                                                                                                                                                                | REPORTED ON PAGE NUMBER: |
|---------------------------|-------------|-------------------------------------------------------------------------------------------------------------------------------------------------------------------------------------------------------------------------------------------------------------------------------|--------------------------|
| Variables                 | 7           | Clearly define all outcomes, exposures, predictors, potential confounders, and effect modifiers. Give diagnostic criteria, if applicable                                                                                                                                      | 9-13                     |
| Data sources/measurements | 8*          | For each variable of interest, give sources of data and details of methods of assessment (measurement). Describe comparability of assessment methods if there is more than one group.                                                                                         | 9-13                     |
| Bias                      | 9           | Describe any efforts to address potential sources of bias.                                                                                                                                                                                                                    | 13-14, 25-26             |
| Study size                | 10          | Explain how the study size was arrived at                                                                                                                                                                                                                                     | 9                        |
| Quantitative variables    | 11          | Explain how quantitative variables were handled in the analyses. If applicable, describe which groupings were chosen and why .                                                                                                                                                | 9-10, 13-14              |
| Statistical methods       | 12a         | Describe all statistical methods, including those used to control for confounding                                                                                                                                                                                             | 13                       |
|                           | 12b         | Describe any methods used to examine subgroups and interactions                                                                                                                                                                                                               | 13                       |
|                           | 12c         | Explain how missing data were addressed                                                                                                                                                                                                                                       | 14                       |
|                           | 12d         | Cohort study—If applicable, explain how loss to follow-up was addressed<br>Case-control study—If applicable, explain how matching of cases and controls was addressed<br>Cross-sectional study—If applicable, describe analytical methods taking account of sampling strategy | N/A                      |
|                           | 12e         | Describe any sensitivity analyses                                                                                                                                                                                                                                             |                          |
| <b>RESULTS</b>            |             |                                                                                                                                                                                                                                                                               |                          |
| Participants              | 13a         | Report numbers of individuals at each stage of study—eg numbers potentially eligible, examined for eligibility, confirmed eligible, included in the study, completing follow-up, and analysed                                                                                 | 15                       |
|                           | 13b         | Give reasons for non-participation at each stage                                                                                                                                                                                                                              | 15                       |
|                           | 13c         | Consider use of a flow diagram                                                                                                                                                                                                                                                | N/A                      |
| Descriptive Data          | 14a         | Give characteristics of study participants (eg demographic, clinical, social) and information on exposures and potential confounders                                                                                                                                          | Table 1, page 15         |
|                           | 14b         | Indicate number of participants with missing data for each variable of interest                                                                                                                                                                                               | Table 1, Suppl. Table 1. |

| SECTION           | ITEM NUMBER | CHECKLIST ITEM                                                                                                                                                                                                                                            | REPORTED ON PAGE NUMBER:             |
|-------------------|-------------|-----------------------------------------------------------------------------------------------------------------------------------------------------------------------------------------------------------------------------------------------------------|--------------------------------------|
|                   | 14c         | Cohort study—Summarise follow-up time (eg, average and total amount)                                                                                                                                                                                      | Table 1.                             |
| Outcome Data      | 15*         | Cohort study—Report numbers of outcome events or summary measures over time<br>Case-control study—Report numbers in each exposure category, or summary measures of exposure<br>Cross-sectional study—Report numbers of outcome events or summary measures | Page 15, Table 1.                    |
| Main Results      | 16a         | Give unadjusted estimates and, if applicable, confounder-adjusted estimates and their precision (e.g. 95% confidence interval). Make clear which confounders were adjusted for and why they were included                                                 | 15-19                                |
|                   | 16b         | Report category boundaries when continuous variables were categorized                                                                                                                                                                                     | 15-19                                |
|                   | 16c         | If relevant, consider translating estimates of relative risk into absolute risk for a meaningful time period                                                                                                                                              | 15-19                                |
|                   | 16d         | Report results of any adjustments for multiple comparisons                                                                                                                                                                                                | 17-19                                |
| Other Analyses    | 17a         | Report other analyses done—e.g. analyses of subgroups and interactions, and sensitivity analyses                                                                                                                                                          | 15-19                                |
|                   | 17b         | If numerous genetic exposures (genetic variants) were examined, summarize results from all analyses undertaken                                                                                                                                            | N/A                                  |
|                   | 17c         | If detailed results are available elsewhere, state how they can be accessed                                                                                                                                                                               | 15-19, supplementary tables and figs |
| <b>DISCUSSION</b> |             |                                                                                                                                                                                                                                                           |                                      |
| Key Results       | 18          | Summarise key results with reference to study objectives                                                                                                                                                                                                  | 20                                   |
| Limitations       | 19          | Discuss limitations of the study, taking into account sources of potential bias or imprecision. Discuss both direction and magnitude of any potential bias                                                                                                | 25-26                                |
| Interpretation    | 20          | Give a cautious overall interpretation of results considering objectives, limitations, multiplicity of analyses, results from similar studies, and other relevant evidence                                                                                | 20-26                                |
| Generalisability  | 21          | Discuss the generalisability (external validity) of the study results<br>Other information                                                                                                                                                                | 20-25                                |
| <b>FUNDING</b>    |             |                                                                                                                                                                                                                                                           |                                      |

| SECTION | ITEM NUMBER | CHECKLIST ITEM                                                                                                                                                | REPORTED ON PAGE NUMBER: |
|---------|-------------|---------------------------------------------------------------------------------------------------------------------------------------------------------------|--------------------------|
|         | 22          | Give the source of funding and the role of the funders for the present study and, if applicable, for the original study on which the present article is based | 27-28                    |
|         |             |                                                                                                                                                               |                          |

\*Give information separately for cases and controls in case-control studies and, if applicable, for exposed and unexposed groups in cohort and cross-sectional studies.
