# Supplementary material for: A Serum Protein Biomarker Panel Improves Outcome Prediction in Human Traumatic Brain Injury
Source: PubMed Central journal article supplement (PMC6761606; doi:10.1089/neu.2019.6375), 2019-09-23

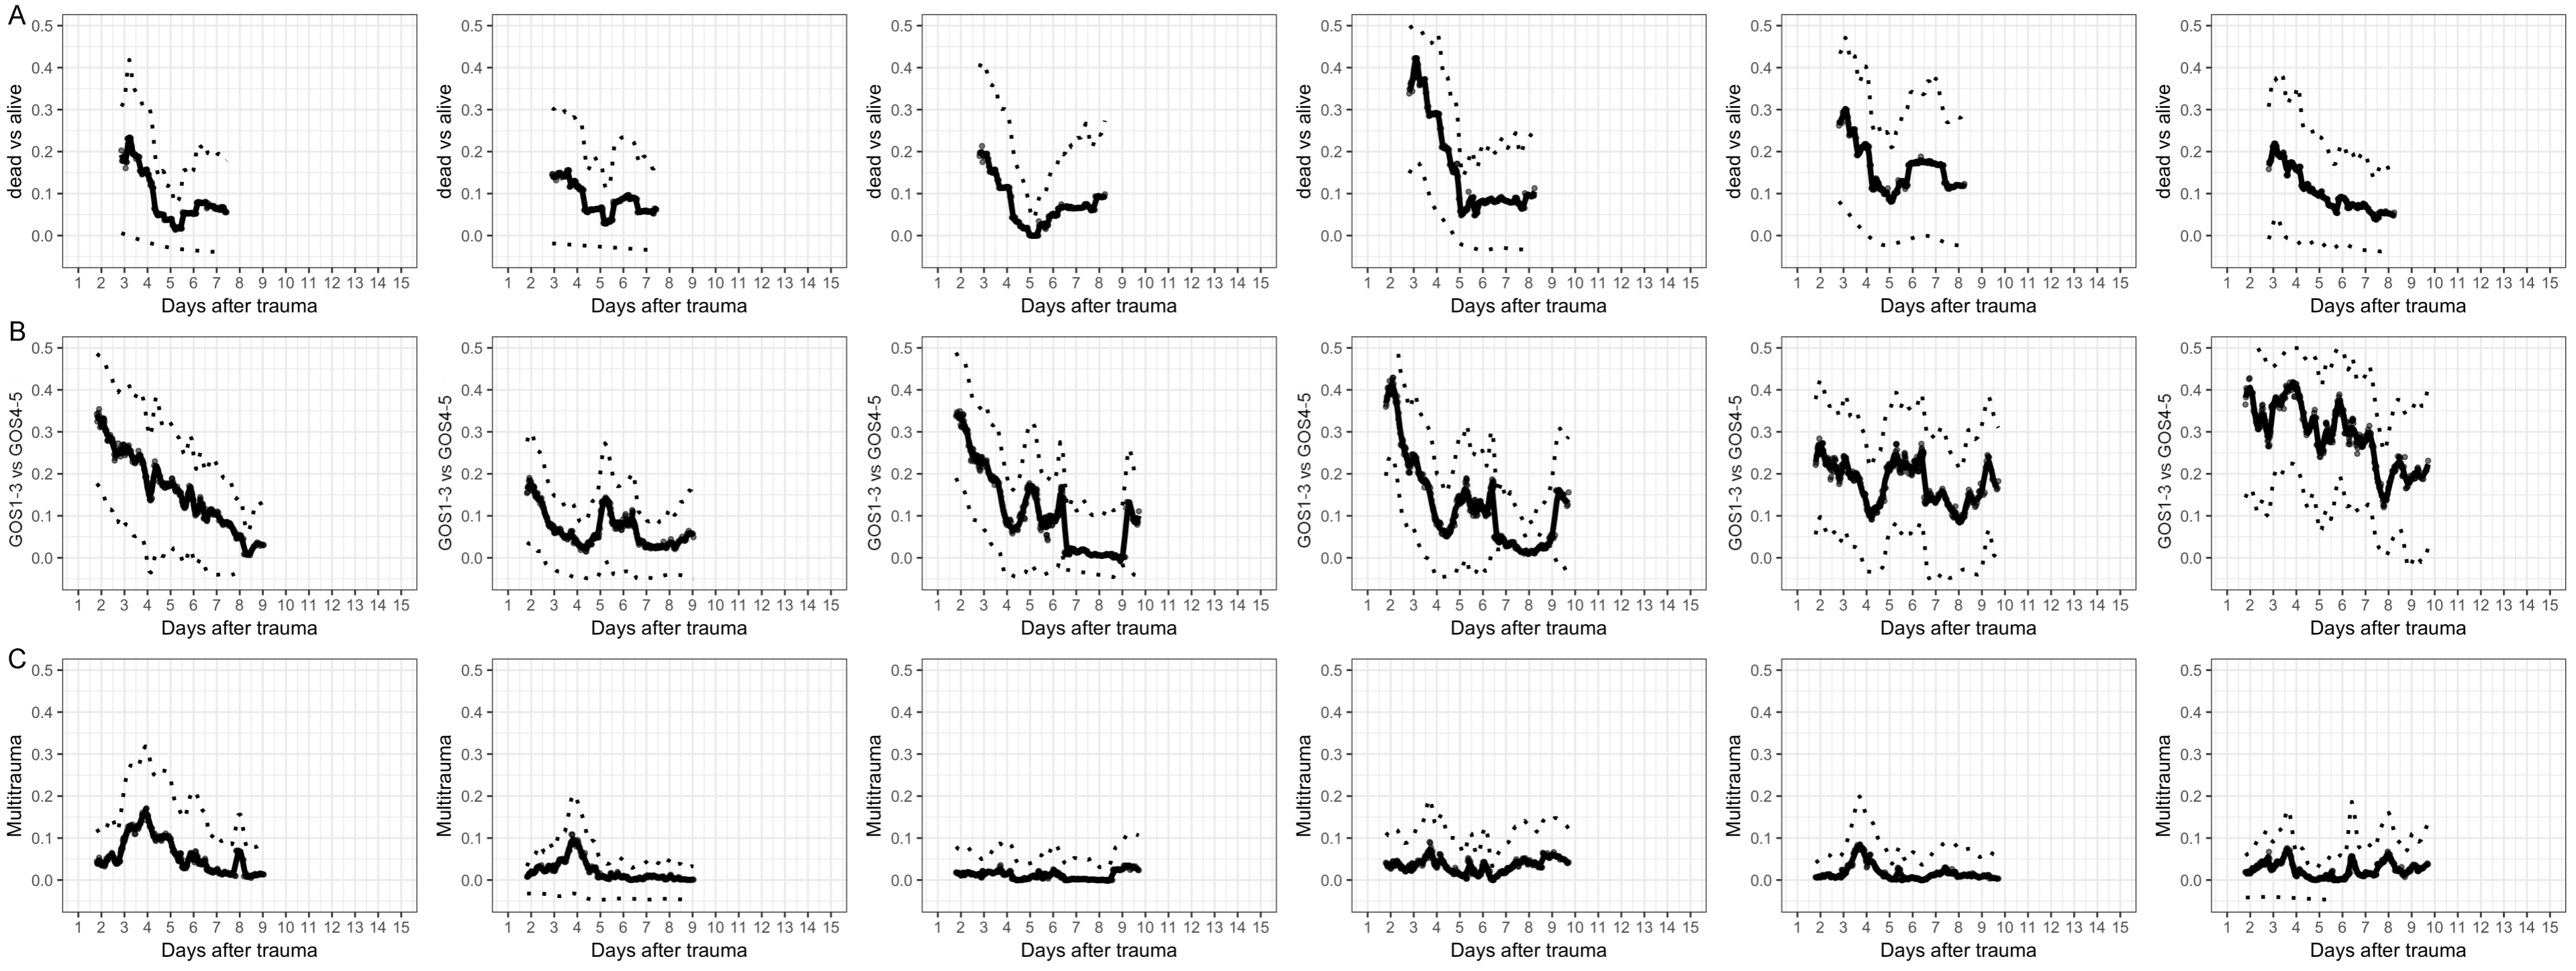

Supplement: Suppl_FigureS3.pdf [file Suppl_FigureS3.pdf]
